# Supplementary material for: PolyA_DB 3 catalogs cleavage and polyadenylation sites identified by deep sequencing in multiple genomes
Source: PubMed Central journal article supplement — Nucleic Acids Res. 2017 Oct 23;46(Database issue):D315–9. doi: 10.1093/nar/gkx1000 (PMC5753232; doi:10.1093/nar/gkx1000), 2017-10-23
Supplement: gkx1000_supp.pdf [file gkx1000_supp.pdf]

## SUPPLEMENTARY INFORMATION

**Table S1. Samples used in the PolyA\_DB 3.**

| <b>Species</b> | <b>Sample source*</b> | <b># of samples</b> | <b># of PAS reads</b> |
|----------------|-----------------------|---------------------|-----------------------|
| Mouse          | 3T3 L1 cells          | 3                   | 2,964,460             |
| Mouse          | C2C12 cells           | 12                  | 11,526,227            |
| Mouse          | Embryonic stem cells  | 5                   | 1,918,629             |
| Mouse          | NIH3T3 cells          | 4                   | 3,027,215             |
| Mouse          | Whole brain           | 13                  | 12,868,996            |
| Mouse          | Whole embryo          | 5                   | 5,145,234             |
| Mouse          | Whole heart           | 4                   | 5,632,945             |
| Mouse          | Whole testis          | 12                  | 14,417,204            |
| Mouse          | Tissue mix            | 1                   | 1,589,997             |
| Human          | A549 cells            | 1                   | 4,339,734             |
| Human          | U87 cells             | 4                   | 27,642,506            |
| Human          | HEK293 cells          | 5                   | 35,112,682            |
| Human          | HeLa cells            | 4                   | 30,832,764            |
| Human          | Embryonic stem cells  | 3                   | 18,660,588            |
| Human          | Tissue mix            | 3                   | 24,294,382            |
| Human          | MCF7 cells            | 4                   | 13,106,557            |
| Rat            | Tissue mix, adult     | 2                   | 3,330,732             |
| Rat            | Whole body, neonatal  | 3                   | 4,946,943             |
| Rat            | Whole brain, adult    | 2                   | 3,796,267             |
| Rat            | Whole heart, adult    | 2                   | 6,713,785             |
| Rat            | Whole testis, adult   | 2                   | 4,828,873             |
| Chicken        | DT40 cells            | 2                   | 6,748,885             |
| Chicken        | Tissue mix            | 1                   | 4,650,015             |
| Chicken        | Whole brain           | 2                   | 5,060,153             |
| Chicken        | Whole heart           | 2                   | 5,736,628             |
| Chicken        | Whole testis          | 2                   | 6,908,810             |

\*Some cell types have both undifferentiated and differentiated states.

**Table S2. PAS distribution in mRNA genes<sup>1</sup>.**

| <b>Species</b> | <b>% in 3'UTR</b> | <b>% in 5'UTR</b> | <b>% in CDS</b> | <b>% in Intron</b> |
|----------------|-------------------|-------------------|-----------------|--------------------|
| Mouse          | 66.7%             | 0.4%              | 5.5%            | 27.4%              |
| Human          | 66.1%             | 0.4%              | 1.8%            | 31.7%              |
| Rat            | 81.2%             | 0.1%              | 2.0%            | 16.7%              |
| Chicken        | 77.2%             | 0.3%              | 3.2%            | 19.4%              |

<sup>1</sup>Based on annotations of RefSeq and Ensembl. See Methods for detail.

**Table S3. PAS distribution in ncRNA genes<sup>1</sup>.**

| <b>Species<sup>2</sup></b> | <b>% in 3'-most exon<sup>3</sup></b> | <b>% in upstream exons</b> | <b>% in introns</b> |
|----------------------------|--------------------------------------|----------------------------|---------------------|
| Mouse                      | 54.0%                                | 7.2%                       | 38.9%               |
| Human                      | 52.4%                                | 6.0%                       | 41.6%               |
| Rat                        | 75.6%                                | 3.4%                       | 20.9%               |

<sup>1</sup>Based on annotations of RefSeq and Ensembl. See Methods for detail.

<sup>2</sup>Chicken data are not included because of a small number of annotated ncRNA genes.

<sup>3</sup>Including single exon genes.
